# Supplementary material for: Stop Worrying about Multiple-Choice: Fact Knowledge Does Not Change with Response Format
Source: MDPI journal article supplement (doi:10.3390/jintelligence10040102), 2022-11-14
Supplement: s1 [file s1]

# Stop Worrying About Multiple-Choice: Fact Knowledge Does Not Change With Response Format

## Supplementary Material

### Method

#### Pilot Study

Please note that some of the items were used in a pilot study, where we sought to obtain some first difficulty estimates for an open-ended and a cued response format for the single items. In this pilot study, we tested  $N = 161$  participants ( $n = 33$  students and  $n = 128$  *Prolific* members;  $M_{\text{age}} = 32.78$ ). In the pilot study, we administered 60 items of the item pool from Steger and colleagues (2019) covering the same broad knowledge domains (natural sciences, social sciences, life sciences, and humanities). However, not all participants worked on all items, or on all response formats, respectively. Prior to responding to an item, participants were presented only with the knowledge question and were asked to indicate whether they knew the answer, whether they did not know the answer, or whether they would know the answer if they were presented with a cue. Participants stating that they would know the answer to a question were referred to the item in the open-ended response format, whereas participants stating they might know the answer if presented with a cue were referred to the cued open-ended item format. Participants stating not to know an answer were referred to an MC response format and instructed to guess. The number of participants working on a specific item in the cued open-ended item format ranged from  $n = 9$ -36 and in the open-ended format from  $n = 3$ -126. After the pilot study, we replaced some of the items, which were either too easy (i.e., all participants solved it correctly) or too difficult (i.e., no participants solved it correctly). Additionally, we decided to add more items to our scale for the main study to obtain a broader assessment of the construct.

## Results

**SM Table S1**

*Descriptive Statistics of All Gc Items.*

| Item   | MC                      |                      |      |                      |      | Cued                 |      |                      |      | Open                 |      |                      |      |
|--------|-------------------------|----------------------|------|----------------------|------|----------------------|------|----------------------|------|----------------------|------|----------------------|------|
|        | Steger et al.<br>(2019) | Study 1<br>(N=46-50) |      | Study 2<br>(N = 300) |      | Study 1<br>(N=46-51) |      | Study 2<br>(N = 300) |      | Study 1<br>(N=45-50) |      | Study 2<br>(N = 300) |      |
|        | M                       | M                    | SD   |
| bio013 | 0.72                    | 0.48                 | 0.50 |                      |      | 0.13                 | 0.34 |                      |      | 0.04                 | 0.21 | 0.05                 | 0.23 |
| bio036 | 0.33                    | 0.26                 | 0.44 | 0.39                 | 0.49 | 0.16                 | 0.37 |                      |      | 0.22                 | 0.42 |                      |      |
| bio067 | 0.47                    | 0.33                 | 0.47 |                      |      | 0.87                 | 0.34 | 0.92                 | 0.27 | 0.56                 | 0.50 |                      |      |
| bio068 | 0.92                    | 0.76                 | 0.43 |                      |      | 0.72                 | 0.46 |                      |      | 0.59                 | 0.50 | 0.67                 | 0.47 |
| bio083 | 0.56                    | 0.52                 | 0.50 |                      |      | 0.33                 | 0.47 |                      |      | 0.20                 | 0.40 | 0.16                 | 0.37 |
| bio084 | 0.87                    | 0.78                 | 0.42 | 0.75                 | 0.43 | 0.64                 | 0.48 |                      |      | 0.43                 | 0.50 |                      |      |
| bio088 | 0.78                    | 0.65                 | 0.48 |                      |      | 0.20                 | 0.40 | 0.22                 | 0.42 | 0.12                 | 0.33 |                      |      |
| che014 | 0.36                    | 0.44                 | 0.50 |                      |      | 0.09                 | 0.28 |                      |      | 0.02                 | 0.15 | 0.02                 | 0.15 |
| che023 | 0.48                    | 0.35                 | 0.48 | 0.50                 | 0.50 | 0.22                 | 0.42 |                      |      | 0.11                 | 0.31 |                      |      |
| che031 | 0.99                    | 0.85                 | 0.36 |                      |      | 0.61                 | 0.49 | 0.60                 | 0.49 | 0.56                 | 0.50 |                      |      |
| che035 | 0.95                    | 0.80                 | 0.40 | 0.88                 | 0.33 | 0.26                 | 0.44 |                      |      | 0.24                 | 0.43 |                      |      |
| che050 | 0.41                    | 0.54                 | 0.50 | 0.57                 | 0.50 | 0.34                 | 0.48 |                      |      | 0.26                 | 0.44 |                      |      |
| che072 | 0.45                    | 0.36                 | 0.48 |                      |      | 0.63                 | 0.49 |                      |      | 0.22                 | 0.42 | 0.21                 | 0.41 |
| che101 | 0.49                    | 0.46                 | 0.50 |                      |      | 0.24                 | 0.43 | 0.26                 | 0.44 | 0.24                 | 0.43 |                      |      |
| nut053 | 0.3                     | 0.33                 | 0.47 |                      |      | 0.17                 | 0.38 | 0.11                 | 0.32 | 0.12                 | 0.33 |                      |      |
| nut074 | 0.99                    | 1.00                 | 0.00 | 0.99                 | 0.10 | 0.92                 | 0.27 |                      |      | 0.67                 | 0.47 |                      |      |
| nut081 | 0.45                    | 0.37                 | 0.49 | 0.39                 | 0.49 | 0.16                 | 0.37 |                      |      | 0.07                 | 0.25 |                      |      |
| nut089 | 0.48                    | 0.46                 | 0.50 |                      |      | 0.30                 | 0.47 |                      |      | 0.26                 | 0.44 | 0.34                 | 0.47 |
| hea008 | 0.57                    | 0.50                 | 0.51 |                      |      | 0.35                 | 0.48 |                      |      | 0.39                 | 0.49 | 0.31                 | 0.46 |
| hea056 | 0.99                    | 0.96                 | 0.20 |                      |      | 0.54                 | 0.50 |                      |      | 0.65                 | 0.48 | 0.69                 | 0.46 |
| hea057 | 0.6                     | 0.41                 | 0.50 |                      |      | 0.33                 | 0.47 | 0.35                 | 0.48 | 0.20                 | 0.40 |                      |      |
| hea063 | 0.79                    | 0.61                 | 0.49 |                      |      | 0.48                 | 0.51 | 0.54                 | 0.50 | 0.42                 | 0.50 |                      |      |
| hea064 | 0.97                    | 0.96                 | 0.21 | 0.95                 | 0.21 | 0.86                 | 0.35 |                      |      | 0.87                 | 0.34 |                      |      |
| hea091 | 0.94                    | 0.94                 | 0.24 |                      |      | 0.78                 | 0.42 |                      |      | 0.70                 | 0.47 | 0.79                 | 0.41 |
| law012 | 0.84                    | 0.35                 | 0.48 |                      |      | 0.22                 | 0.42 | 0.08                 | 0.27 | 0.20                 | 0.40 |                      |      |
| law015 | 0.56                    | 0.26                 | 0.44 |                      |      | 0.39                 | 0.49 | 0.34                 | 0.47 | 0.12                 | 0.33 |                      |      |
| law029 | 0.92                    | 0.89                 | 0.31 | 0.91                 | 0.29 | 0.68                 | 0.47 |                      |      | 0.50                 | 0.51 |                      |      |
| law068 | 0.84                    | 0.74                 | 0.44 |                      |      | 0.43                 | 0.50 |                      |      | 0.37                 | 0.49 | 0.32                 | 0.47 |
| law081 | 0.36                    | 0.26                 | 0.44 | 0.38                 | 0.49 | 0.02                 | 0.14 |                      |      | 0.13                 | 0.34 |                      |      |
| law105 | 0.35                    | 0.50                 | 0.51 |                      |      | 0.61                 | 0.49 | 0.71                 | 0.46 | 0.18                 | 0.39 |                      |      |
| art007 | 0.43                    | 0.26                 | 0.44 |                      |      | 0.15                 | 0.36 | 0.20                 | 0.40 | 0.16                 | 0.37 |                      |      |
| art008 | 0.35                    | 0.13                 | 0.34 | 0.31                 | 0.46 | 0.22                 | 0.42 |                      |      | 0.22                 | 0.42 |                      |      |
| art017 | 0.53                    | 0.57                 | 0.50 | 0.54                 | 0.50 | 0.12                 | 0.33 |                      |      | 0.17                 | 0.38 |                      |      |
| art018 | 0.57                    | 0.39                 | 0.49 |                      |      | 0.09                 | 0.28 | 0.17                 | 0.37 | 0.18                 | 0.39 |                      |      |
| art041 | 0.92                    | 0.65                 | 0.48 |                      |      | 0.36                 | 0.48 | 0.57                 | 0.50 | 0.22                 | 0.42 |                      |      |
| art047 | 0.87                    | 0.91                 | 0.28 |                      |      | 0.63                 | 0.49 |                      |      | 0.56                 | 0.50 | 0.25                 | 0.43 |
| art028 | 0.88                    | 0.52                 | 0.50 | 0.65                 | 0.48 | 0.24                 | 0.43 |                      |      | 0.20                 | 0.40 |                      |      |
| lit024 | 0.59                    | 0.46                 | 0.50 | 0.49                 | 0.50 | 0.28                 | 0.45 |                      |      | 0.22                 | 0.42 |                      |      |

|        |      |      |      |      |      |      |      |      |      |      |      |      |      |
|--------|------|------|------|------|------|------|------|------|------|------|------|------|------|
| lit040 | 0.52 | 0.44 | 0.50 |      |      | 0.41 | 0.50 |      |      | 0.49 | 0.51 | 0.48 | 0.50 |
| lit042 | 0.88 | 0.57 | 0.50 |      |      | 0.33 | 0.47 | 0.44 | 0.50 | 0.20 | 0.40 |      |      |
| lit046 | 0.93 | 0.70 | 0.47 | 0.83 | 0.37 | 0.30 | 0.46 |      |      | 0.46 | 0.50 |      |      |
| lit051 | 0.95 | 0.62 | 0.49 |      |      | 0.67 | 0.47 |      |      | 0.17 | 0.38 | 0.22 | 0.42 |
| lit124 | 0.36 | 0.34 | 0.48 |      |      | 0.46 | 0.50 |      |      | 0.07 | 0.25 | 0.15 | 0.36 |
| med002 | 0.3  | 0.32 | 0.47 |      |      | 0.17 | 0.38 |      |      | 0.13 | 0.34 | 0.22 | 0.42 |
| med009 | 0.54 | 0.43 | 0.50 | 0.45 | 0.50 | 0.42 | 0.50 |      |      | 0.41 | 0.50 |      |      |
| med047 | 0.85 | 0.72 | 0.46 | 0.77 | 0.42 | 0.28 | 0.45 |      |      | 0.48 | 0.51 |      |      |
| med060 | 0.44 | 0.20 | 0.40 |      |      | 0.15 | 0.36 | 0.23 | 0.42 | 0.14 | 0.35 |      |      |
| med062 | 0.9  | 0.87 | 0.34 |      |      | 0.61 | 0.49 | 0.73 | 0.44 | 0.46 | 0.50 |      |      |
| med078 | 0.63 | 0.57 | 0.50 |      |      | 0.09 | 0.28 | 0.02 | 0.15 | 0.02 | 0.14 |      |      |
| med093 | 0.57 | 0.39 | 0.49 | 0.49 | 0.50 | 0.74 | 0.44 |      |      | 0.35 | 0.48 |      |      |
| med096 | 0.65 | 0.46 | 0.50 |      |      | 0.57 | 0.50 |      |      | 0.39 | 0.49 | 0.33 | 0.47 |
| mus015 | 0.45 | 0.22 | 0.42 | 0.30 | 0.46 | 0.04 | 0.20 |      |      | 0.00 | 0.00 |      |      |
| mus021 | 0.39 | 0.28 | 0.45 |      |      | 0.52 | 0.51 |      |      | 0.28 | 0.46 | 0.18 | 0.38 |
| mus040 | 0.45 | 0.43 | 0.50 |      |      | 0.72 | 0.46 | 0.68 | 0.47 | 0.32 | 0.47 |      |      |
| mus043 | 0.62 | 0.38 | 0.49 |      |      | 0.72 | 0.46 |      |      | 0.43 | 0.50 | 0.44 | 0.50 |
| mus046 | 0.84 | 0.83 | 0.38 |      |      | 0.11 | 0.31 | 0.27 | 0.44 | 0.12 | 0.33 |      |      |
| phy057 | 0.44 | 0.41 | 0.50 |      |      | 0.28 | 0.46 | 0.38 | 0.49 | 0.30 | 0.46 |      |      |
| phy075 | 0.81 | 0.56 | 0.50 |      |      | 0.24 | 0.43 |      |      | 0.35 | 0.48 | 0.26 | 0.44 |
| phy090 | 0.56 | 0.43 | 0.50 | 0.46 | 0.50 | 0.08 | 0.27 |      |      | 0.22 | 0.42 |      |      |
| phy109 | 0.53 | 0.78 | 0.42 |      |      | 0.89 | 0.31 | 0.90 | 0.30 | 0.42 | 0.50 |      |      |
| pol029 | 0.46 | 0.48 | 0.50 |      |      | 0.33 | 0.47 |      |      | 0.28 | 0.46 | 0.26 | 0.44 |
| pol034 | 0.73 | 0.63 | 0.49 |      |      | 0.59 | 0.50 | 0.64 | 0.48 | 0.35 | 0.48 |      |      |
| pol048 | 0.79 | 0.72 | 0.45 |      |      | 0.63 | 0.49 |      |      | 0.54 | 0.50 | 0.57 | 0.50 |
| pol058 | 0.65 | 0.41 | 0.50 | 0.52 | 0.50 | 0.30 | 0.46 |      |      | 0.20 | 0.40 |      |      |
| pol070 | 0.32 | 0.28 | 0.46 | 0.24 | 0.43 | 0.10 | 0.31 |      |      | 0.07 | 0.25 |      |      |
| pol104 | 0.49 | 0.38 | 0.49 |      |      | 0.13 | 0.34 |      |      | 0.09 | 0.28 | 0.08 | 0.28 |
| eco029 | 0.53 | 0.30 | 0.46 |      |      | 0.00 | 0.00 |      |      | 0.02 | 0.15 | 0.04 | 0.20 |
| eco038 | 0.72 | 0.63 | 0.49 |      |      | 0.02 | 0.15 | 0.02 | 0.14 | 0.00 | 0.00 |      |      |
| eco050 | 0.89 | 0.83 | 0.38 | 0.87 | 0.34 | 0.46 | 0.50 |      |      | 0.50 | 0.51 |      |      |
| eco062 | 0.84 | 0.68 | 0.47 |      |      | 0.50 | 0.51 |      |      | 0.39 | 0.49 | 0.49 | 0.50 |
| eco086 | 0.88 | 0.74 | 0.44 |      |      | 0.70 | 0.47 | 0.80 | 0.40 | 0.66 | 0.48 |      |      |
| eco090 | 0.48 | 0.52 | 0.51 | 0.54 | 0.50 | 0.10 | 0.30 |      |      | 0.30 | 0.47 |      |      |

*Note.* bio = biology, che = chemistry, nut = nutrition, hea = health, law = law, art = art, lit = literature, med = medicine, mus = music, phy = physics, pol = politics, eco = economics.

Biology, chemistry, and physics belong to the broad knowledge domain of natural sciences.

Economics and politics belong to the broad knowledge domain of social sciences. Literature,

art, and music belong to the broad knowledge domain of humanities. Nutrition, medicine, and

health belong to the broad knowledge domain of life sciences.

**SM Table S2***Odds Ratios for All Items (Study 1).*

| Item    | MC vs. Cued |        |       | Cued vs. Open |        |       | MC vs. Open |        |       |
|---------|-------------|--------|-------|---------------|--------|-------|-------------|--------|-------|
|         | OR          | 95%-CI |       | OR            | 95%-CI |       | OR          | 95%-CI |       |
|         |             | lower  | upper |               | lower  | upper |             | lower  | upper |
| bio013  | 0.17        | 0.06   | 0.45  | 0.32          | 0.04   | 1.54  | 0.05        | 0.01   | 0.2   |
| bio036  | 0.55        | 0.19   | 1.49  | 1.45          | 0.51   | 4.24  | 0.79        | 0.29   | 2.09  |
| bio067* | 13.08       | 4.78   | 41.4  | 0.2           | 0.06   | 0.53  | 2.59        | 1.14   | 6.11  |
| bio068  | 0.8         | 0.32   | 2.03  | 0.56          | 0.23   | 1.35  | 0.45        | 0.18   | 1.09  |
| bio083  | 0.45        | 0.19   | 1.03  | 0.51          | 0.19   | 1.32  | 0.23        | 0.09   | 0.56  |
| bio084  | 0.5         | 0.19   | 1.23  | 0.44          | 0.19   | 0.99  | 0.22        | 0.08   | 0.54  |
| bio088  | 0.13        | 0.05   | 0.34  | 0.57          | 0.17   | 1.75  | 0.08        | 0.02   | 0.21  |
| che014  | 0.13        | 0.03   | 0.38  | 0.26          | 0.01   | 1.97  | 0.03        | 0      | 0.17  |
| che023  | 0.53        | 0.21   | 1.32  | 0.44          | 0.13   | 1.36  | 0.24        | 0.07   | 0.69  |
| che031  | 0.29        | 0.1    | 0.76  | 0.82          | 0.36   | 1.86  | 0.23        | 0.08   | 0.61  |
| che035  | 0.09        | 0.03   | 0.23  | 0.9           | 0.35   | 2.29  | 0.08        | 0.03   | 0.21  |
| che050  | 0.44        | 0.19   | 1     | 0.69          | 0.28   | 1.67  | 0.3         | 0.12   | 0.72  |
| che072  | 2.98        | 1.31   | 7.03  | 0.17          | 0.06   | 0.41  | 0.5         | 0.19   | 1.23  |
| che101  | 0.38        | 0.15   | 0.92  | 1             | 0.39   | 2.62  | 0.38        | 0.15   | 0.91  |
| ern053  | 0.44        | 0.16   | 1.17  | 0.78          | 0.25   | 2.41  | 0.34        | 0.12   | 0.93  |
| ern074  | NA          | NA     | NA    | 0.19          | 0.05   | 0.58  | NA          | NA     | NA    |
| ern081  | 0.33        | 0.12   | 0.86  | 0.38          | 0.07   | 1.45  | 0.13        | 0.03   | 0.42  |
| ern089  | 0.52        | 0.22   | 1.2   | 0.81          | 0.32   | 2.03  | 0.42        | 0.17   | 0.99  |
| gsu008  | 0.54        | 0.23   | 1.22  | 1.2           | 0.51   | 2.85  | 0.65        | 0.28   | 1.46  |
| gsu056  | 0.05        | 0.01   | 0.21  | 1.56          | 0.67   | 3.69  | 0.08        | 0.01   | 0.33  |
| gsu057  | 0.69        | 0.29   | 1.63  | 0.52          | 0.2    | 1.32  | 0.36        | 0.14   | 0.89  |
| gsu063  | 0.59        | 0.26   | 1.36  | 0.79          | 0.35   | 1.79  | 0.47        | 0.2    | 1.06  |
| gsu064  | 0.3         | 0.04   | 1.35  | 1.08          | 0.32   | 3.71  | 0.32        | 0.04   | 1.54  |
| gsu091  | 0.24        | 0.05   | 0.87  | 0.64          | 0.24   | 1.65  | 0.15        | 0.03   | 0.53  |
| jur012  | 0.53        | 0.2    | 1.33  | 0.9           | 0.33   | 2.47  | 0.47        | 0.18   | 1.19  |
| jur015  | 1.8         | 0.74   | 4.49  | 0.26          | 0.09   | 0.68  | 0.47        | 0.16   | 1.31  |
| jur029  | 0.27        | 0.08   | 0.77  | 0.48          | 0.2    | 1.09  | 0.13        | 0.04   | 0.36  |

|         |      |      |       |      |      |        |      |      |      |
|---------|------|------|-------|------|------|--------|------|------|------|
| jur068  | 0.28 | 0.11 | 0.64  | 0.77 | 0.33 | 1.77   | 0.21 | 0.09 | 0.5  |
| jur081* | 0.07 | 0    | 0.37  | 6.5  | 1.01 | 173.35 | 0.43 | 0.14 | 1.26 |
| jur105  | 1.55 | 0.67 | 3.59  | 0.15 | 0.05 | 0.36   | 0.23 | 0.08 | 0.56 |
| kun007  | 0.52 | 0.17 | 1.45  | 1.22 | 0.41 | 3.77   | 0.63 | 0.23 | 1.68 |
| kun008  | 1.85 | 0.63 | 5.95  | 0.99 | 0.36 | 2.64   | 1.82 | 0.6  | 5.96 |
| kun017  | 0.11 | 0.04 | 0.29  | 1.53 | 0.48 | 5.14   | 0.17 | 0.06 | 0.42 |
| kun018  | 0.16 | 0.04 | 0.47  | 2.55 | 0.77 | 10.25  | 0.4  | 0.15 | 0.97 |
| kun028  | 0.31 | 0.13 | 0.7   | 0.5  | 0.19 | 1.23   | 0.15 | 0.06 | 0.38 |
| kun041  | 0.17 | 0.04 | 0.52  | 0.75 | 0.33 | 1.71   | 0.13 | 0.03 | 0.38 |
| kun047  | 0.3  | 0.12 | 0.7   | 0.78 | 0.28 | 2.13   | 0.23 | 0.09 | 0.56 |
| lit024  | 0.47 | 0.2  | 1.09  | 0.72 | 0.27 | 1.84   | 0.34 | 0.13 | 0.83 |
| lit040  | 0.9  | 0.39 | 2.03  | 1.41 | 0.62 | 3.27   | 1.27 | 0.56 | 2.87 |
| lit042  | 0.38 | 0.16 | 0.88  | 0.52 | 0.2  | 1.32   | 0.2  | 0.08 | 0.48 |
| lit046  | 0.19 | 0.08 | 0.45  | 1.94 | 0.84 | 4.59   | 0.37 | 0.15 | 0.87 |
| lit051  | 1.26 | 0.54 | 2.97  | 0.11 | 0.04 | 0.27   | 0.13 | 0.05 | 0.34 |
| lit124  | 1.62 | 0.71 | 3.75  | 0.12 | 0.03 | 0.36   | 0.19 | 0.05 | 0.59 |
| med002  | 0.45 | 0.16 | 1.18  | 0.72 | 0.21 | 2.3    | 0.33 | 0.11 | 0.9  |
| med009  | 0.94 | 0.42 | 2.14  | 0.97 | 0.43 | 2.21   | 0.92 | 0.4  | 2.11 |
| med047  | 0.16 | 0.06 | 0.38  | 2.33 | 1    | 5.56   | 0.37 | 0.15 | 0.86 |
| med060  | 0.74 | 0.24 | 2.23  | 1.06 | 0.34 | 3.35   | 0.79 | 0.26 | 2.3  |
| med062  | 0.24 | 0.08 | 0.66  | 0.55 | 0.24 | 1.24   | 0.13 | 0.04 | 0.35 |
| med078  | 0.08 | 0.02 | 0.23  | 0.24 | 0.01 | 1.81   | 0.02 | 0    | 0.1  |
| med093  | 4.33 | 1.85 | 10.65 | 0.19 | 0.08 | 0.45   | 0.83 | 0.35 | 1.96 |
| med096  | 1.52 | 0.68 | 3.45  | 0.5  | 0.21 | 1.15   | 0.76 | 0.33 | 1.71 |
| mus015  | NA   | NA   | NA    | NA   | NA   | NA     | NA   | NA   | NA   |
| mus021  | 2.76 | 1.19 | 6.62  | 0.37 | 0.15 | 0.86   | 1.01 | 0.41 | 2.5  |
| mus040  | 3.24 | 1.37 | 7.96  | 0.19 | 0.08 | 0.45   | 0.62 | 0.26 | 1.42 |
| mus043  | 4.05 | 1.74 | 9.9   | 0.31 | 0.13 | 0.73   | 1.25 | 0.55 | 2.86 |
| mus046  | 0.03 | 0.01 | 0.09  | 1.11 | 0.3  | 4.26   | 0.03 | 0.01 | 0.09 |
| phy057  | 0.56 | 0.23 | 1.35  | 1.09 | 0.45 | 2.67   | 0.61 | 0.26 | 1.43 |
| phy075  | 0.25 | 0.1  | 0.6   | 1.68 | 0.68 | 4.3    | 0.42 | 0.18 | 0.96 |
| phy090  | 0.12 | 0.03 | 0.36  | 3.09 | 0.93 | 12.46  | 0.37 | 0.14 | 0.9  |

|         |      |      |      |      |      |       |      |      |      |
|---------|------|------|------|------|------|-------|------|------|------|
| phy109  | 2.23 | 0.71 | 7.93 | 0.09 | 0.03 | 0.26  | 0.21 | 0.08 | 0.5  |
| pol029  | 0.53 | 0.23 | 1.21 | 0.82 | 0.33 | 2.01  | 0.43 | 0.18 | 1    |
| pol034  | 0.84 | 0.36 | 1.95 | 0.4  | 0.17 | 0.91  | 0.34 | 0.14 | 0.76 |
| pol048  | 0.67 | 0.28 | 1.59 | 0.7  | 0.3  | 1.62  | 0.47 | 0.2  | 1.09 |
| pol058  | 0.61 | 0.26 | 1.43 | 0.57 | 0.21 | 1.47  | 0.35 | 0.13 | 0.89 |
| pol070  | 0.35 | 0.11 | 1.01 | 0.53 | 0.1  | 2.2   | 0.19 | 0.04 | 0.65 |
| pol104  | 0.25 | 0.08 | 0.68 | 0.65 | 0.15 | 2.5   | 0.16 | 0.04 | 0.49 |
| wir029  | NA   | NA   | NA   | NA   | NA   | NA    | NA   | NA   | NA   |
| wir038  | 0.02 | 0    | 0.08 | 0.92 | 0.02 | 36.57 | 0.01 | 0    | 0.07 |
| wir050  | 0.18 | 0.07 | 0.46 | 1.17 | 0.52 | 2.64  | 0.22 | 0.08 | 0.55 |
| wir062  | 0.48 | 0.2  | 1.09 | 0.65 | 0.28 | 1.48  | 0.31 | 0.13 | 0.71 |
| wir086  | 0.81 | 0.32 | 2.03 | 0.85 | 0.35 | 2.02  | 0.69 | 0.28 | 1.67 |
| wir090* | 0.11 | 0.03 | 0.3  | 3.82 | 1.3  | 13.11 | 0.41 | 0.17 | 0.95 |

---

*Note.* Items marked with a \* were excluded from analyses, because scoring the responses to these items were ambiguous. If values are NA, then the computation of odds ratios was not possible due to extreme responses in one of the two corresponding item formats (i.e., either all participants solved an item, or no participant solved an item). bio = biology, che = chemistry, nut = nutrition, hea = health, law = law, art = art, lit = literature, med = medicine, mus = music, phy = physics, pol = politics, eco = economics. Biology, chemistry, and physics belong to the broad knowledge domain of natural sciences. Economics and politics belong to the broad knowledge domain of social sciences. Literature, art, and music belong to the broad knowledge domain of humanities. Nutrition, medicine, and health belong to the broad knowledge domain of life sciences.

**SM Table S3**

*Mean differences between test scores per response format of the single itemsets in Study 1.*

| Itemset | Response Formats |      | <i>Mean (SD)</i> |           | <i>t</i> | <i>df</i> | <i>p</i> | <i>d</i> | <i>d</i> 95%-CI |
|---------|------------------|------|------------------|-----------|----------|-----------|----------|----------|-----------------|
|         | X                | Y    | X                | Y         |          |           |          |          |                 |
| A       | MC               | Cued | .54 (.16)        | .39 (.18) | 4.2      | 88.7      | < .001   | .87      | [.43; 1.30]     |
|         | MC               | Open | .54 (.16)        | .30 (.20) | 6.3      | 84.95     | < .001   | 1.3      | [.85; 1.77]     |
|         | Cued             | Open | .39 (.18)        | .30 (.20) | 2.3      | 88.6      | < .05    | .48      | [.06; .90]      |
|         | MC               | Cued | .53 (.16)        | .34 (.19) | 5.4      | 96.35     | < .001   | 1.09     | [.66; 1.51]     |
| B       | MC               | Open | .53 (.16)        | .28 (.17) | 7.4      | 97.68     | < .001   | 1.48     | [1.03; 1.93]    |
|         | Cued             | Open | .34 (.19)        | .28 (.17) | 1.6      | 97.46     | .10      | .33      | [-.07; .72]     |
|         | MC               | Cued | .54 (.16)        | .41 (.19) | 3.5      | 88.13     | < .001   | .72      | [.29; 1.14]     |
| C       | MC               | Open | .54 (.16)        | .30 (.19) | 6.3      | 87.76     | < .001   | 1.32     | [.86; 1.78]     |
|         | Cued             | Open | .41 (.19)        | .30 (.19) | 2.7      | 89.98     | < .01    | .57      | [.14; .99]      |

*Note.* *d* = Cohen's *d*. All provided descriptive statistics in this table refer to Figure 1 of the manuscript.

**SM Table S4**

*Means, standard deviations, skew, kurtosis, and bivariate correlations for all indicators used in the measurement models of Study 2.*

|    | Variable     | <i>M</i> | <i>SD</i> | Skew | Kurtosis | 1      | 2      | 3      | 4      | 5      | 6      | 7      | 8      | 9      | 10     | 11     | 12     |
|----|--------------|----------|-----------|------|----------|--------|--------|--------|--------|--------|--------|--------|--------|--------|--------|--------|--------|
| 1  | gc.mc_nat    | .59      | .24       | -.17 | -.58     | 1      |        |        |        |        |        |        |        |        |        |        |        |
| 2  | gc.mc_soc    | .71      | .24       | -.51 | -.31     | .27*** | 1      |        |        |        |        |        |        |        |        |        |        |
| 3  | gc.mc_hum    | .52      | .24       | .23  | -.66     | .35*** | .36*** | 1      |        |        |        |        |        |        |        |        |        |
| 4  | gc.mc_life   | .53      | .26       | .00  | -.65     | .28*** | .28*** | .31*** | 1      |        |        |        |        |        |        |        |        |
| 5  | gc.open_nat  | .23      | .18       | .72  | .17      | .30*** | .32*** | .29*** | .37*** | 1      |        |        |        |        |        |        |        |
| 6  | gc.open_soc  | .34      | .26       | .41  | -.79     | .30*** | .46*** | .34*** | .31*** | .37*** | 1      |        |        |        |        |        |        |
| 7  | gc.open_hum  | .31      | .25       | .48  | -.66     | .31*** | .38*** | .53*** | .35*** | .37*** | .45*** | 1      |        |        |        |        |        |
| 8  | gc.open_life | .40      | .28       | .27  | -.69     | .31*** | .33*** | .41*** | .43*** | .40*** | .40*** | .42*** | 1      |        |        |        |        |
| 9  | gc.cued_nat  | .67      | .21       | -.06 | -.70     | .29*** | .27*** | .26*** | .23*** | .31*** | .26*** | .35*** | .37*** | 1      |        |        |        |
| 10 | gc.cued_soc  | .43      | .21       | -.12 | -.70     | .31*** | .42*** | .32*** | .30*** | .31*** | .56*** | .40*** | .39*** | .29*** | 1      |        |        |
| 11 | gc.cued_hum  | .39      | .25       | .39  | -.38     | .30*** | .31*** | .56*** | .38*** | .33*** | .39*** | .53*** | .49*** | .31*** | .47*** | 1      |        |
| 12 | gc.cued_life | .33      | .23       | .29  | -.84     | .34*** | .27*** | .39*** | .46*** | .48*** | .41*** | .42*** | .56*** | .37*** | .43*** | .49*** | 1      |
| 13 | Defocusing   | .07      | .12       | 2.31 | 5.03     | .20*** | .14*   | .17**  | .13*   | .27*** | .27*** | .27*** | .13*   | .20*** | .21*** | .17**  | .23*** |

*Note.* \*\*\*  $p < .001$ ; \*\*  $p < .01$ ; \*  $p < .05$



**SM Table S5***Measurement Models of the Response Formats.*

|    | Measurement Model | <i>n</i><br>(Indicators) | <i>n</i><br>(Persons) | $\chi^2$ | df  | CFI  | RMSEA | [90% CI]     | SRMR | $\omega$ | exclusion due to                            |
|----|-------------------|--------------------------|-----------------------|----------|-----|------|-------|--------------|------|----------|---------------------------------------------|
| 1a | MC Items          | 23                       | 308                   | 382.94   | 230 | .659 | .047  | [.038; .055] | .121 | .65      | guessing (1 item)                           |
| 1b | MC Items          | 19                       | 308                   | 182.6    | 152 | .920 | .026  | [.004; .038] | .093 | .67      | misfit (2 items),<br>low $r_{it}$ (2 items) |
| 2a | Open Items        | 24                       | 308                   | 336.97   | 252 | .907 | .033  | [.023; .042] | .118 | .78      |                                             |
| 2b | Open Items        | 22                       | 308                   | 261.97   | 209 | .940 | .029  | [.016; .039] | .109 | .79      | misfit (1 item),<br>low $r_{it}$ (1 item)   |
| 3a | Cued Items        | 24                       | 308                   | 352.03   | 252 | .915 | .036  | [.027; .045] | .132 | .81      |                                             |
| 3b | Cued Items        | 23                       | 308                   | 305.45   | 230 | .932 | .033  | [.022; .042] | .129 | .80      | misfit (1 item)                             |

*Note.*  $\omega$  = McDonald's Omega (McDonald, 1999). Please note that one item for the MC scale had to be excluded from the scale initially, because the item was below guessing probability and had an  $r_{it} < .05$ . The unidimensional measurement model did not converge with the item included. We excluded MC items below the corresponding guessing probability for the MC format (i.e., *guessing*; cutoff-value for considering an item answered with guessing probability .25). In addition to that, we examined the corrected item-test-correlations for all response formats and excluded items with  $r_{it} < .18$  from the scales (low  $r_{it}$ ). After that, we computed unidimensional measurement models per subscale and excluded items which considerably deteriorated model fit (*misfit*).

**SM Figure S1**

*Correlated Factors of the Response Formats with Defocusing.*

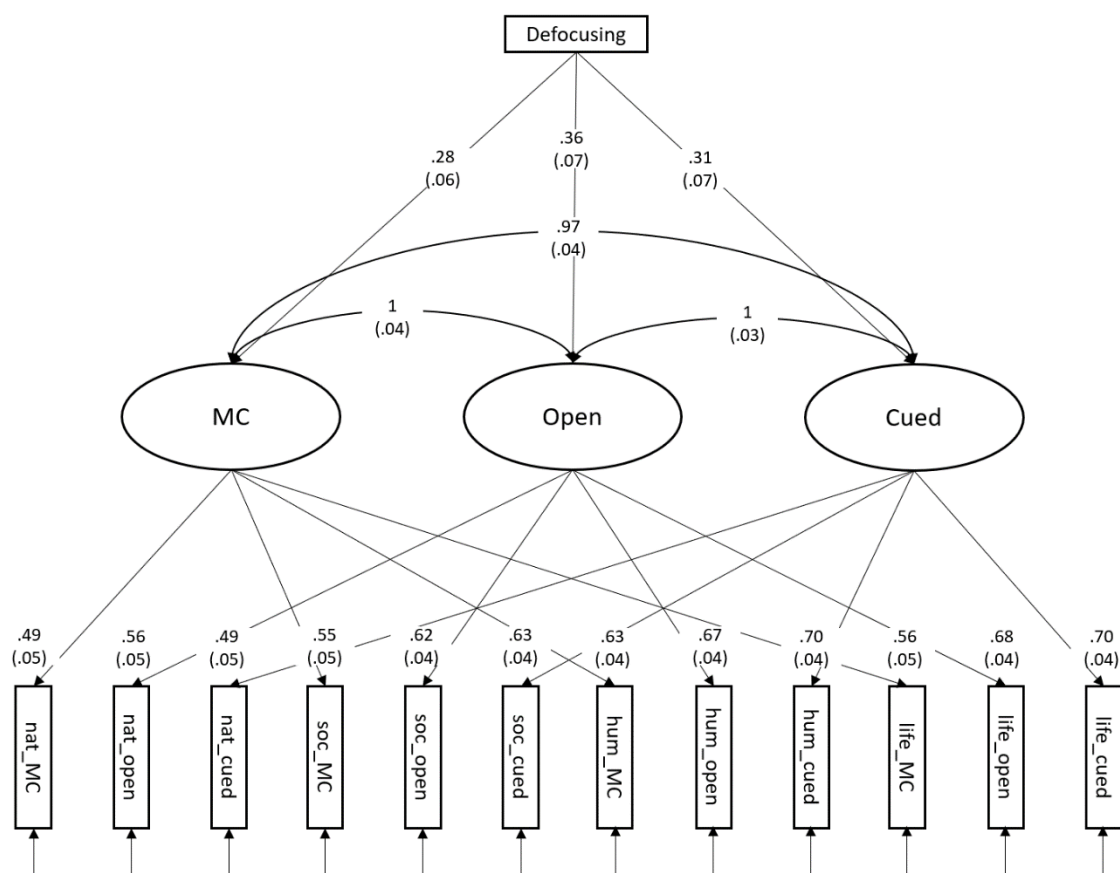

*Note.* All parameters are standardized.  $n = 300$ ;  $\chi^2(60) = 164.02$ , CFI = .914, RMSEA = .076, SRMR = .045. Standard errors are depicted in parentheses. Please note that this model is an extension of model A of Table 3 in the manuscript.

**SM Figure S2**

*A General Factor Model with Defocusing.*

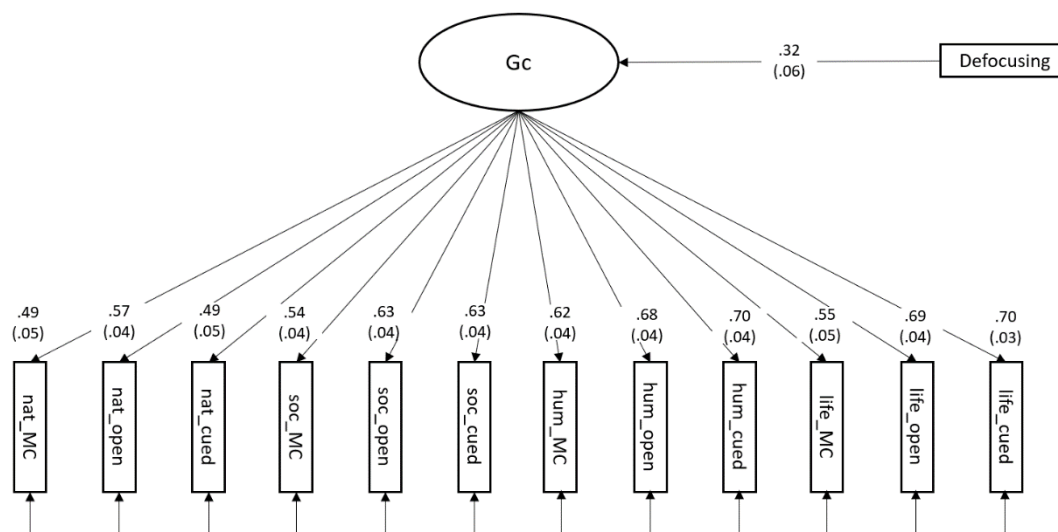

*Note.* All parameters are standardized.  $n = 300$ ;  $\chi^2(65) = 168.15$ , CFI = .914, RMSEA = .073, SRMR = .046. Standard errors are depicted in parentheses. Please note that this model is an extension of model B of Table 3 in the manuscript.

**SM Figure S3**

*Correlated Factors of the Broad Knowledge Domains Across Response Formats.*

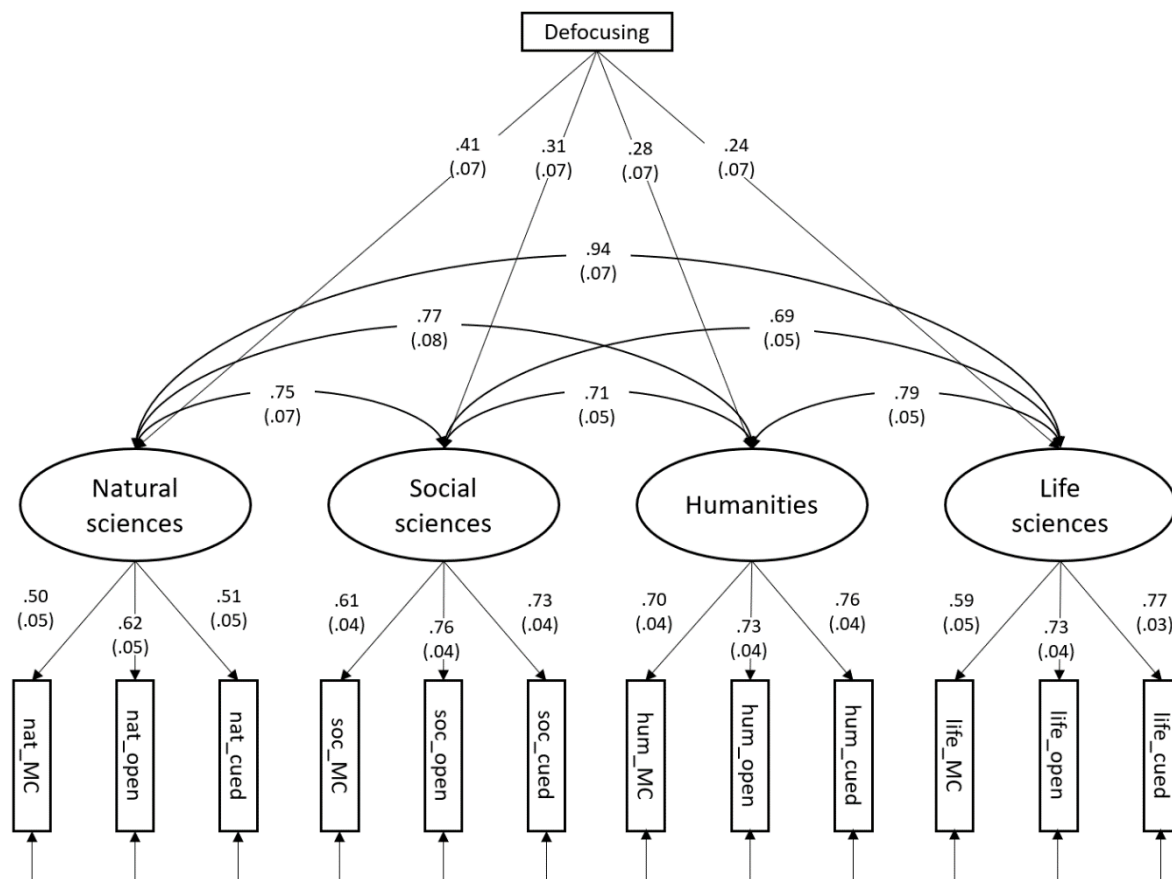

*Note.* All parameters are standardized.  $n = 300$ ;  $\chi^2(56) = 67.04$ , CFI = .991, RMSEA = .026, SRMR = .028. Standard errors are depicted in parentheses. Please note that this model is an extension of model C of Table 3 in the manuscript.

**SM Figure S4***Higher-Order Model of the Broad Knowledge Domains Across Response Formats.*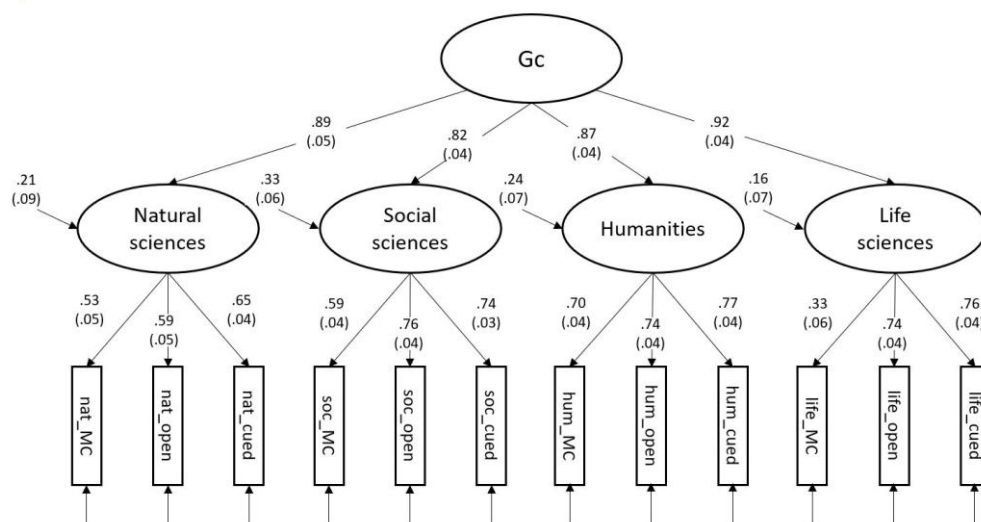

*Note.* All parameters are standardized.  $n = 300$ ;  $\chi^2(50) = 62.98$ , CFI = .989, RMSEA = .029, SRMR = .029. Standard errors are depicted in parentheses. Please note that this model a depiction of model D of Table 3 in the manuscript. Please note that we specified the same model with age as a predictor of Gc, and found that age was not a substantial predictor of Gc ( $\beta = .13$ ,  $p = .073$ ;  $n = 300$ ;  $\chi^2(61) = 112.44$ , CFI = .958, RMSEA = .053, SRMR = .042).

## References

- McDonald, R. P. (1999). *Test theory: A unified treatment*. Erlbaum.
- Steger, D., Schroeders, U., & Wilhelm, O. (2019). On the dimensionality of crystallized intelligence: A smartphone-based assessment. *Intelligence*, 72, 76–85.
